# Supplementary material for: Novel onboard ammonia cracker for light-duty automotive fuel cell vehicles
Source: Royal Society of Chemistry journal article supplement (doi:10.1039/d4ya00601a), 2025-01-01
Supplement: d4ya00601a1.pdf [file d4ya00601a1.pdf]

## Supplementary Information

### Appendix A

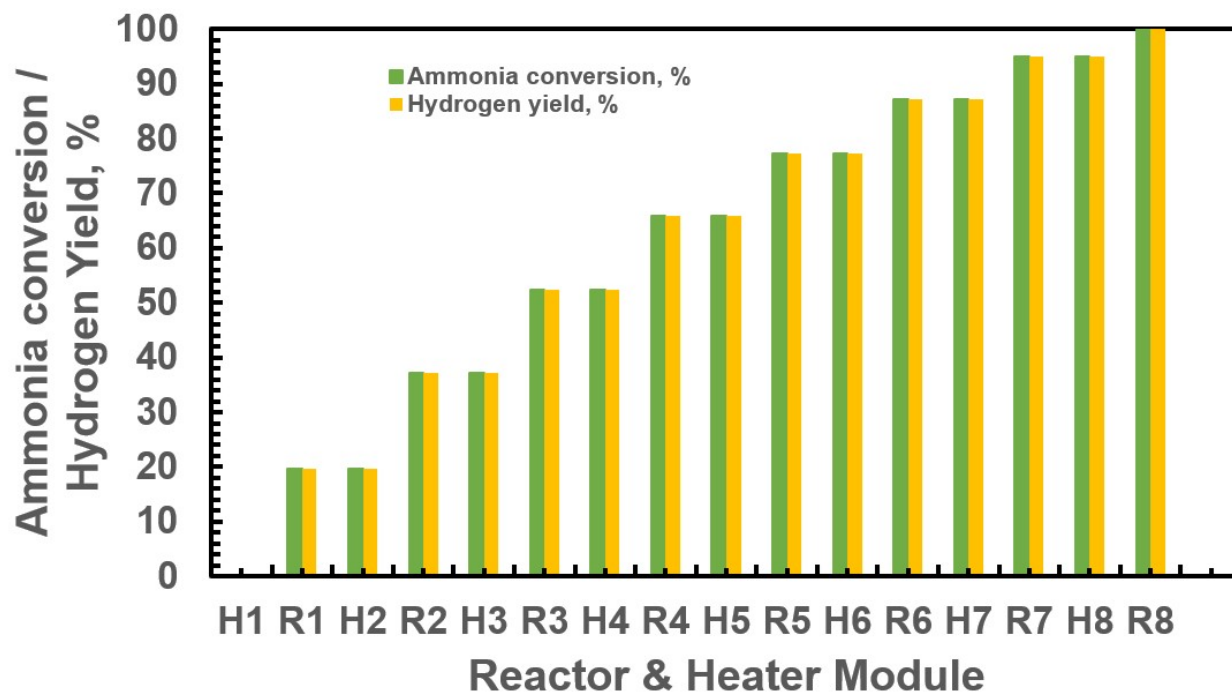

**Fig. 1** : Results of 4 x 4 Intermediate Heating and Cracking HFMR Module showing Overall Ammonia Conversion (%) and Overall Hydrogen Yield at each reactor exit

## Appendix B

(a)

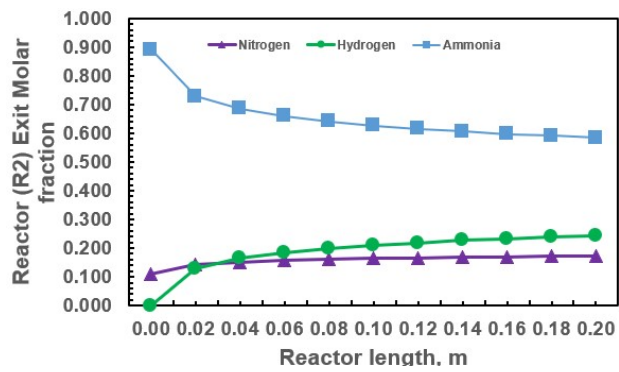

(b)

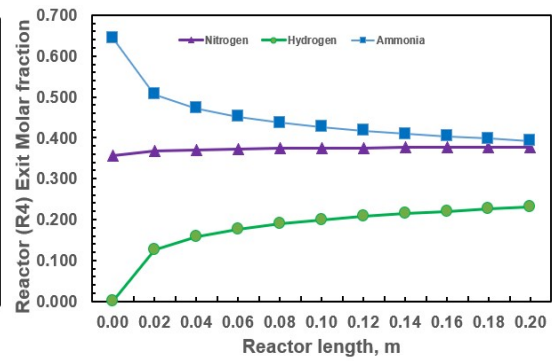

(c)

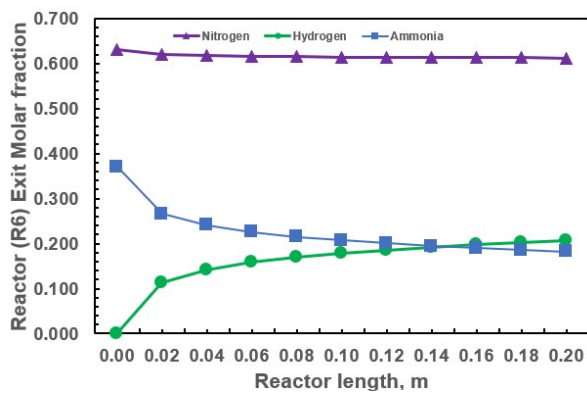

(d)

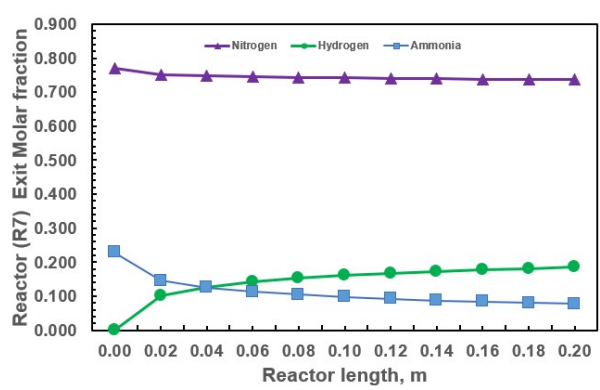

Fig. 2: 3 x 3 Simultaneous Heating and Cracking HFMR Module Performance Profile

## Appendix C

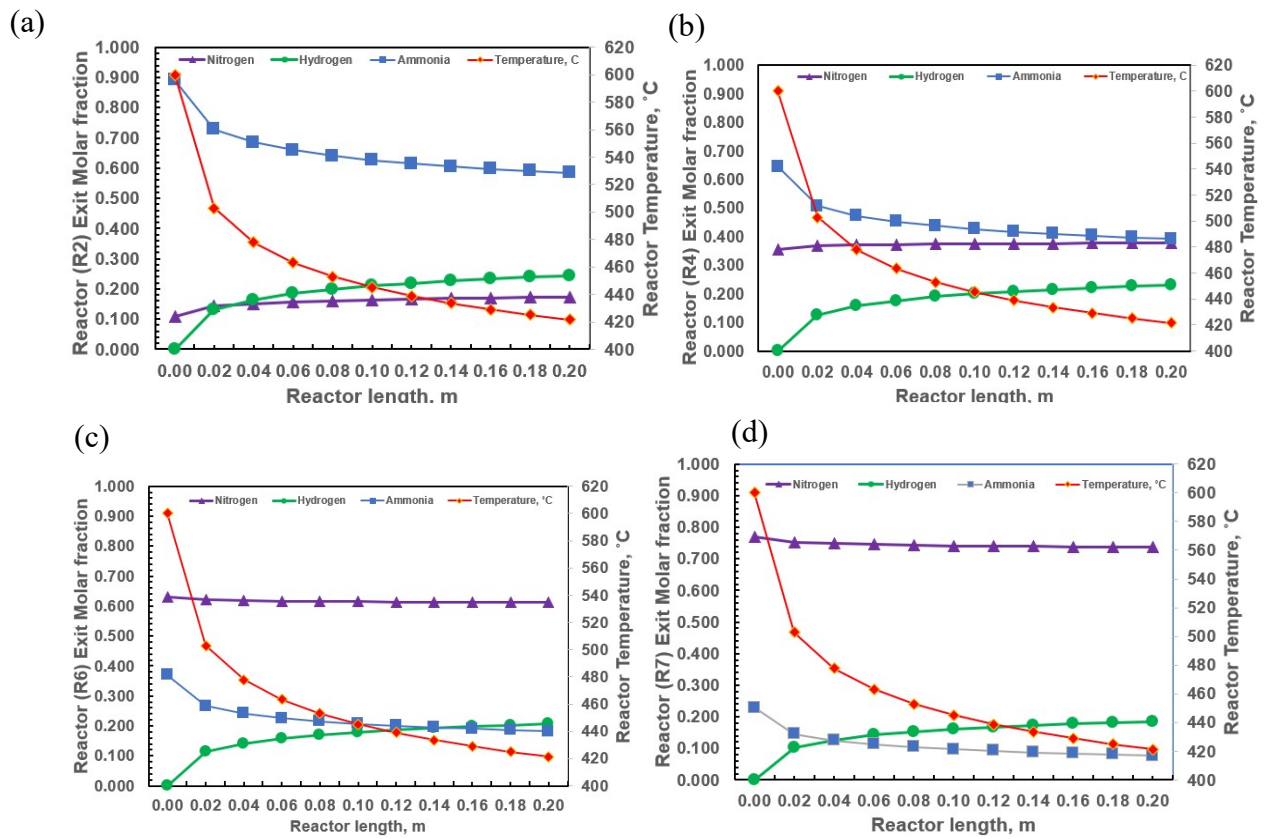

**Fig. 3:** 4 x 4 Intermediate Heating and Cracking HFMR Module Performance Profile

## Appendix D

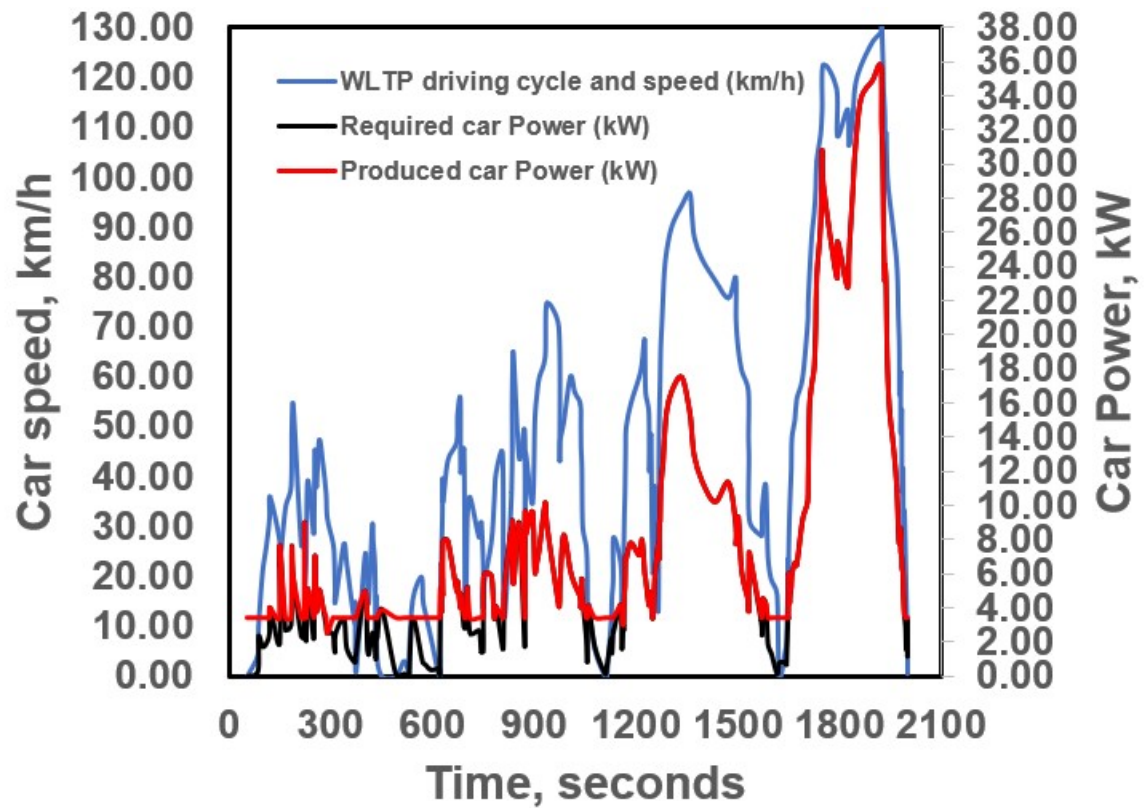

**Fig. 4:** Transient behaviour of On-Board Ammonia Cracker showing the performance of the car speed and power during different driving cycles
